# 1 A unified simulation model for 2 understanding the diversity of cancer 3 evolution

4 **Atsushi Niida<sup>1</sup>, Takanori Hasegawa<sup>2</sup>, Hideki Innan<sup>3</sup>, Tatsuhiro Shibata<sup>1</sup>,**  
5 **Koshi Mimori<sup>4</sup>, and Satoru Miyano<sup>5</sup>**

6 <sup>1</sup>Laboratory of Molecular Medicine, Human Genome Center, the Institute of Medical  
7 Science, the University of Tokyo, Tokyo, Japan

8 <sup>2</sup>Division of Health Medical Data Science, Health Intelligence Center, the Institute of  
9 Medical Science, the University of Tokyo, Tokyo, Japan

10 <sup>3</sup>SOKENDAI, The Graduate University for Advanced Studies, Hayama, Japan

11 <sup>4</sup>Department of Surgery, Kyushu University Beppu Hospital, Beppu, Japan

12 <sup>5</sup>Laboratory of DNA Information Analysis, Human Genome Center, the Institute of  
13 Medical Science, the University of Tokyo, Tokyo, Japan

14 Corresponding author:

15 Atsushi Niida<sup>1</sup>

16 Email address: [aniida@ims.u-tokyo.ac.jp](mailto:aniida@ims.u-tokyo.ac.jp)

## 17 ABSTRACT

18 Because cancer evolution underlies the therapeutic difficulties of cancer, it is clinically important to  
19 understand the evolutionary dynamics of cancer. Thus far, a number of evolutionary processes have  
20 been proposed to be working in cancer evolution. However, there exists no simulation model that can  
21 describe the different evolutionary processes in a unified manner. In this study, we constructed a unified  
22 simulation model for describing the different evolutionary processes and performed sensitivity analysis  
23 on the model to determine the conditions in which cancer growth is driven by each of the different  
24 evolutionary processes. Our sensitivity analysis has successfully provided a series of novel insights  
25 into the evolutionary dynamics of cancer. For example, we found that, while a high neutral mutation  
26 rate shapes neutral intratumor heterogeneity (ITH) characterized by a fractal-like pattern, a stem cell  
27 hierarchy can also contribute to shaping neutral ITH by apparently increasing the mutation rate. Although  
28 It has been reported that the evolutionary principle shaping ITH shifts from selection to accumulation  
29 of neutral mutations during colorectal tumorigenesis, our simulation revealed the possibility that this  
30 evolutionary shift is triggered by drastic evolutionary events that occur in a short time and confer  
31 a marked fitness increase on one or a few cells. This result helps us understand that each process  
32 works not separately but simultaneously and continuously as a series of phases of cancer evolution.  
33 Collectively, this study serves as a basis to understand in greater depth the diversity of cancer evolution.

## 34 INTRODUCTION

35 Cancer is regarded as a disease of evolution; during tumorigenesis, a normal cell evolves to a malignant  
36 population by means of mutation accumulation and adaptive Darwinian selection. Evolution allows  
37 cancer cells to adapt to a new environment and acquire malignant phenotypes such as metastasis and  
38 therapeutic resistance. Therefore, it is clinically important to understand cancer evolutionary dynamics.  
39 The view of cancer as an evolutionary system was established by Nowell (1976). By combining this view  
40 with a series of discoveries of onco- and tumor suppressor genes (hereinafter, collectively referred to as  
41 “driver genes”), Fearon and Vogelstein (1990) proposed a multistep model for colorectal carcinogenesis.  
42 Since then, cancer evolution has generally been described as “linear evolution,” where driver mutations  
43 are acquired linearly in a step-wise manner, generating a malignant clonal population.

44 However, this simple view of cancer evolution has been challenged since the advent of the next gener-  
45 ation sequencing technology (Yates and Campbell, 2012; McGranahan and Swanton, 2017; Niida et al.,

2018b). Deep sequencing demonstrated that subclonality prevails in both blood and solid tumors, and multiregion sequencing of various types of solid tumor more dramatically unveiled intratumor heterogeneity (ITH), which results from the branching process in a cancer cell population along with mutation accumulation. These genomic studies also found that subclones often harbor mutations in known driver genes, suggesting that at least a part of ITH is subject to Darwinian selection. In some types of cancer, such as renal cell carcinoma (Turajlic et al., 2018) and low-grade glioma (Suzuki et al., 2015), this Darwinian selection-driven branching process is especially prominent; we observed convergent evolution in which different subclonal mutations are acquired in the same driver gene or pathway.

Other types of tumors, however, show no clear enrichment of driver mutations in subclonal mutations. Consistently with this observation, several studies employing mathematical modeling have suggested that the accumulation of neutral mutations that do not affect the growth or survival of cancer cells mainly shapes ITH; that is, neutral mutations are the major contributors of ITH in multiple types of cancers (Uchi et al., 2016; Sottoriva et al., 2015; Ling et al., 2015; Niida et al., 2018a). The evolutionary principles shaping ITH differ not only among cancer types but also between stages of tumorigenesis. We and others have recently reported that ITH in the early stage of colorectal tumorigenesis involves selection, whereas neutral mutation plays the central role in shaping IHT in the later stages (Saito et al., 2018; Cross et al., 2018).

In addition to single nucleotide mutation- and small indel-driven drivers, recent studies have demonstrated that, in multiple types of cancers, more drastic chromosome- and/or genome-wide evolutionary events producing copy number alterations and chromosomal rearrangements may have occurred in a short time at the early stage of cancer evolution (Gao et al., 2016; Baca et al., 2013). Such large-scale events could confer a marked fitness increase on one or a few cells, which expand to constitute the tumor mass uniformly. This type of evolution is referred to as “punctuated evolution” after the term “punctuated equilibrium”, which was proposed for species evolution by Gould and Eldredge to challenge the long-standing paradigm of gradual Darwinian evolution (Gould and Eldredge, 1972; Jay Gould and Eldredge, 1993), although the underlying molecular mechanisms that cause rapid bursts of change are very different.

Collectively, at least four scenarios of cancer evolution were proposed (Davis et al., 2017). In this paper, we term the four scenarios as the linear-replacing, punctuated-replacing, driver-branching, and neutral-branching processes (Figs. 1A-1D). The linear-replacing process applies when newly arisen clones repeatedly spread and replace the entire population very quickly. A special case of the linear-replacing process is the punctuated-replacing process, where a number of drastic changes occur in a very short time and a very fit clone spreads and replaces the entire population very quickly. In the driver-branching process, multiple subclones having distinct driver mutations coexist to shape ITH, whereas, in the neutral-branching process, there are no significant driver mutations when accumulating mutations that constitute ITH.

To obtain an understanding of cancer evolutionary dynamics, many mathematical models of cancer evolution have been developed (Beerenwinkel et al., 2014; Altrock et al., 2015); in particular, agent-based simulation models are commonly employed for this purpose (Sottoriva et al., 2015; Waclaw et al., 2015; Uchi et al., 2016; Iwasaki and Innan, 2017; Minussi et al., 2019; Poleszczuk et al., 2015). In agent-based simulation models, each cell in a tumor correspond to an agent; the cells can divide to produce new cells, die, or migrate, and each cell’s behavior can be stochastically determined from its own state and/or the environment surrounding the cell. By applying sensitivity analysis to the simulation models, (i.e., examining the simulation results while changing the parameters of the models), it is possible to identify the factors affecting the cancer evolutionary dynamics (Niida et al., 2019). However, to the best of our knowledge, there exists no simulation work aiming to reproduce and analyze the four above-stated evolutionary processes in a unified manner.

In this paper, we introduce a unified agent-based simulation model, which is simple but sufficient to reproduce the four evolutionary processes (Figs. 1A-1D). Although the unified model is formulated in the Materials & Methods section, the Results section presents a family of simulation models, each of which constitutes submodels of the unified model. While constructing the submodels, we explore the conditions leading to, and the ITH pattern from the four processes. The Results section is composed of four parts. In the first part, we introduce the driver model, which contains only driver mutations, and examine the conditions leading to the linear-replacing and driver-branching processes. In the second part, the neutral model, which contains only neutral mutations, is introduced to address the conditions leading to a neutral

101 pattern of ITH. We show that, although a high neutral mutation rate is necessary for the neutral pattern  
102 of ITH, a stem cell hierarchy can also contribute to the neutral pattern by apparently increasing the  
103 mutation rate. In the third part, we present a combination of these two models as a composite model and  
104 reproduce realistic ITH patterns, which are generated by mixing the neutral pattern with the pattern from  
105 the linear-replacing or driver-branching processes. In the final part, we build the punctuated model by  
106 incorporating the punctuated-replacing process into the composite model. Our simulation based on the  
107 punctuated model demonstrates that the punctuated-replacing process triggers an evolutionary shift from  
108 the driver- to the neutral-branching process that are commonly observed during colorectal tumorigenesis  
109 (Fig. 1E). This result helps us understand that each process works not separately but simultaneously and  
110 continuously as a series of “phases” of cancer evolution.

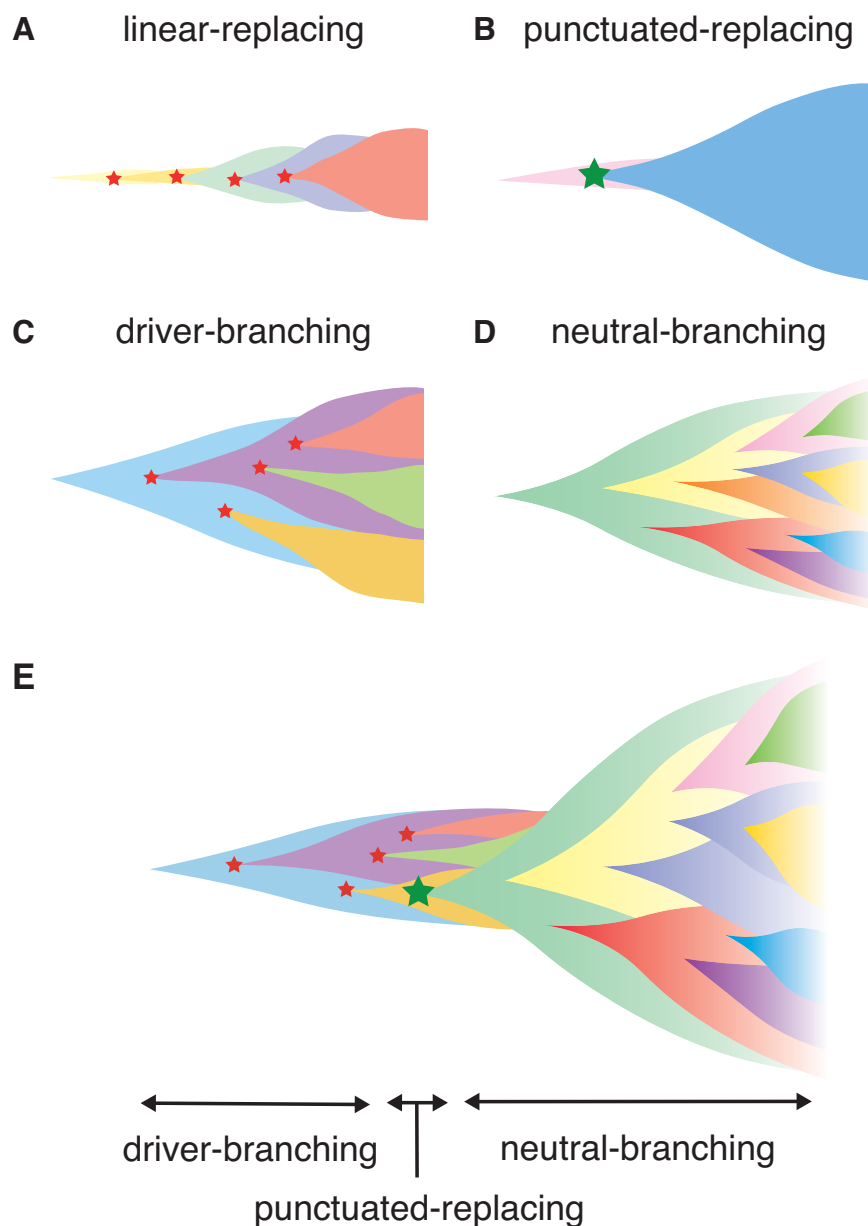

**Figure 1. Illustrating the scenarios in cancer evolution.** (A-D) The four typical evolutionary processes. Red stars indicate normal driver events, which are assumed to be single nucleotide mutations and small indels, while green stars indicate more drastic chromosome- and/or genome-wide evolutionary events producing copy number alterations and chromosomal rearrangements. (E) Our model explaining the temporal shift of evolutionary principles shaping ITH during colorectal tumorigenesis.

## 111 MATERIALS & METHODS

### 112 Simulation model

113 Although we described a family of simulation models in the Results section, we here formulate the uni-  
114 fied model, which encompasses these models. Starting from a stem cell without mutations, the following  
115 time steps are repeated until the number of population size  $p$  reaches  $P$  or the number of time steps  $t$   
116 reaches  $T$ . For each time step, each cell is subject to cell division with a probability  $g$  and cell death  
117 with a probability  $d$ .  $g$  depends on a base division rate  $g_0$ , the increase in the cell division probability

118 per driver mutation  $f$ , the number of driver mutations accumulated in the cell  $n_d$ , population size  $p$ , and  
 119 the carrying capacity  $p_c$ :  $g = g_0 f^{n_d} (1 - p/p_c)$ .  $d$  depends on the base death rate  $d_0$ , the decrease in  
 120 the cell death probability per driver mutation, and the number of driver mutations accumulated in the cell  
 121  $n_d$ :  $d = d_0 e^{-n_d}$ . When the cell is a differentiated cell,  $d_0$  is replaced by  $d_0^d$ , which is the base death rate  
 122 for differentiated cells:  $d = d_0^d e^{-n_d}$ . The order of the trials of cell division and death is flipped with  
 123 probability 0.5. We also assumed that cell death occurs only in the case where  $p > 1$ , to prevent the  
 124 simulation from halting before clonal expansion.

125 In a cell division, the cell is replicated into two daughter cells. If the parent cell is a stem cell,  
 126 one of the two daughter cells is differentiated with a probability  $1 - s$ ; that is,  $s$  expresses the probabili-  
 127 ty of symmetrical division. For each of the two daughter cells, we introduce  $k_d$  driver and  $k_n$  neutral  
 128 mutations.  $k_d$  and  $k_n$  are sampled from Poisson distributions, the parameters of which are  $m_d/2$  and  
 129  $m_n/2$ , respectively:  $k_d \sim \text{Pois}(m_d/2)$  and  $k_n \sim \text{Pois}(m_n/2)$ . Note that this means that each cell divi-  
 130 sion generates  $m_d$  driver and  $m_n$  neutral mutations on average. We assumed each mutation acquired  
 131 by different division events occurs at different genomic positions and each cell can accumulate  $N_d$   
 132 driver and  $N_n$  neutral mutations at maximum. When each of the two daughter cells has  $N_d$  driver muta-  
 133 tions, we further attempted to introduce an explosive driver mutation; the explosive driver mutation  
 134 is introduced with a probability  $m_e$  and sets the carrying capacity  $p_c$  of the cell to infinite. The pseu-  
 135 docode for the unified model is provided as Algorithm 1. The variables and parameters employed in  
 136 the unified model are listed in Tables 1 and 2. The simulation code used in this study is available from  
 137 <https://github.com/atusiniida/canevosim>.

**Table 1.** Variables

| Symbol | Description                                             |
|--------|---------------------------------------------------------|
| $k_d$  | Number of driver mutations obtained in a cell division  |
| $n_d$  | Number of driver mutations accumulated in a cell        |
| $k_n$  | Number of neutral mutations obtained in a cell division |
| $p$    | Population size                                         |
| $t$    | Number of time steps                                    |
| $g$    | Cell division probability                               |
| $d$    | Cell death probability                                  |

**Table 2.** Parameters

| Symbol  | Description                                                      |
|---------|------------------------------------------------------------------|
| $m_d$   | Expected number of driver mutations generated per cell division  |
| $m_n$   | Expected number of neutral mutations generated per cell division |
| $m_e$   | Probability of acquiring an explosive mutation                   |
| $N_d$   | Maximum number of driver mutations accumulated in a cell         |
| $N_n$   | Maximum number of neutral mutations accumulated in a cell        |
| $f$     | Increase of the cell division probability per driver mutation    |
| $e$     | Decrease of the cell death probability per driver mutation       |
| $g_0$   | Base cell division probability                                   |
| $d_0$   | Base cell death probability for stem cells                       |
| $d_0^d$ | Base cell death probability for differentiated cells             |
| $s$     | Symmetrical division probability                                 |
| $p_c$   | Carrying capacity                                                |
| $P$     | Maximum population size                                          |
| $T$     | Maximum number of time steps                                     |

### 138 Post-processing of simulation results

139 To evaluate the simulation results quantitatively, we calculated summary statistics based on 1000 cells  
 140 randomly sampled from each simulated tumor. these summary statistics are listed in Table 3. time

---

**Algorithm 1** Unified model

---

```
1: prepare a stem cell without mutations
2: while  $p < P$  or  $t < T$  do
3:   for each cell do
4:      $g = g_0 f^{n_d} (1 - p/p_c)$ 
5:      $d = d_0 e^{-n_d}$ 
6:     if the cell is a differentiated cell then
7:        $d = d_0^d e^{-n_d}$ 
8:     if  $\text{rand} < 0.5$  then
9:       if  $\text{rand}() < g$  then
10:        divide(the cell)
11:       if  $p > 1$  and  $\text{rand}() < d$  then
12:        kill the cell (accordingly,  $p = p - 1$ )
13:       # in the case that the cell is replicated, kill one of the two daughter cells
14:     else
15:       if  $p > 1$  and  $\text{rand}() < d$  then
16:        kill the cell (accordingly,  $p = p - 1$ )
17:       if  $\text{rand}() < g$  then
18:        divide(the cell)
19:    $t = t + 1$ 
20:
21:
22: function rand()
23:   return a random number ranging from 0 to 1
24:
25: function divide(a cell)
26:   replicate the cell into two daughter cells (accordingly,  $p = p + 1$ )
27:   if the parent cell is a stem cell then
28:     if  $\text{rand}() > s$  then
29:       differentiate one of the daughter cells
30:   for each of the daughter cells do
31:     introduce  $k_d \sim \text{Pois}(m_d/2)$  driver mutations
32:     introduce  $k_n \sim \text{Pois}(m_n/2)$  neutral mutations
33:     if  $n_d = \sum k_d$  reaches the upper limit  $N_d$  then
34:       if  $\text{rand}() < m_e$  then
35:         set  $p_c$  of the cell to infinite
```

---

141 and population size indicate the numbers of time steps and cells, respectively, when the simulation is  
 142 complete. mutation count per cell represents the mean number of mutations accumulated in each of the  
 143 randomly sampled 1000 cells. By combining the mutations of the 1000 cells, we defined the mutations  
 144 that occur in 95% or more of the 1000 cells as clonal mutations, and the others as subclonal mutations.  
 145 The numbers of clonal, subclonal, and both types of mutations were then defined as clonal mutation  
 146 count, subclonal mutation count, and total mutation count, from which clonal mutation proportion  
 147 and subclonal mutation proportion were further calculated. The degree of ITH was also measured by  
 148 Shannon and Simpson indices, which were calculated based on the proportions of different subclones  
 149 (i.e., cell subpopulations with different mutations) after removing mutations having a frequency less of  
 150 than 5% or 10%: Shannon index 0.05, Shannon index 0.1, Simpson index 0.05, and Simpson  
 151 index 0.1. Similarly, after removing mutations having a frequency of less than 5% or 10%, we also  
 152 checked whether multiple subclones harboring different driver mutations coexist, which is represented  
 153 as binary statistics, driver-branching 0.05, and driver-branching 0.1. When the simulated tumor had  
 154 differentiated cells or subclones with explosive driver mutations, the proportion of the subpopulation was  
 155 calculated as subpopulation proportion .

156 The single-cell mutation profiles of the 1000 cells are represented as a binary matrix, the row and  
 157 column indices of which are mutations and samples, respectively. To interpret the simulation results  
 158 intuitively, we also visualized the binary matrix by utilizing the heatmap function in R after the following  
 159 pre-processing, if necessary. When the number of rows was less than 10, empty rows were added to the  
 160 matrix so that the number of rows was 10. When the number of rows was more than 300, we extracted  
 161 the 300 rows with the highest mutation occurrence so that the number of rows was 300. In the neutral  
 162 and neutral-s models, we exceptionally set the maximum row number to 1000 in order to visualize  
 163 low-frequency mutations. The visualized matrix is accompanied by a left-side blue bar indicating the  
 164 driver mutations. When the simulated tumor had differentiated cells or subclones with explosive driver  
 165 mutations, the subpopulation is indicated by the purple bar on the top of the visualized matrix.

**Table 3.** Summary statistics

| Name                          | Description                                                                                                                                           |
|-------------------------------|-------------------------------------------------------------------------------------------------------------------------------------------------------|
| time                          | Number of time steps when simulation is finished                                                                                                      |
| population size               | Number of cells when simulation is finished                                                                                                           |
| mutation count per cell       | Mean number of mutations accumulated in each cell                                                                                                     |
| clonal mutation count         | Number of clonal mutations                                                                                                                            |
| subclonal mutation count      | Number of subclonal mutations                                                                                                                         |
| total mutation count          | clonal mutation count + subclonal mutation count                                                                                                      |
| clonal mutation proportion    | clonal mutation count / total mutation count                                                                                                          |
| subclonal mutation proportion | subclonal mutation count / total mutation count                                                                                                       |
| Shannon index 0.1             | Shannon index calculated with a mutation frequency cutoff of 0.1                                                                                      |
| Shannon index 0.05            | Shannon index calculated with a mutation frequency cutoff of 0.05                                                                                     |
| Simpson index 0.1             | Simpson index calculated with a mutation frequency cutoff of 0.1                                                                                      |
| Simpson index 0.05            | Simpson index calculated with a mutation frequency cutoff of 0.05                                                                                     |
| driver-branching 0.05         | Binary statistic indicating that multiple subclones harboring different driver mutations coexist, calculated with a mutation frequency cutoff of 0.05 |
| driver-branching 0.1          | Binary statistic indicating that multiple subclones harboring different driver mutations coexist, calculated with a mutation frequency cutoff of 0.1  |
| subpopulation proportion      | proportion of differentiated cells or subclones with explosive driver mutations                                                                       |



## 166 Sensitivity analysis based on MASSIVE

167 To cover a sufficiently large parameter space in the sensitivity analysis, we employed a supercomputer,  
168 SHIROKANE4 (at Human Genome Center, The Institute of Medical Science, The University of Tokyo).  
169 The simulation and post-processing steps for different parameter settings were parallelized on Univa  
170 Grid Engine. For each model, we employed a full factorial design involving four parameters (i.e., we  
171 tested every combination of candidate values of the four parameters) while other parameters were fixed.  
172 The parameter values used for our analysis are listed in Table 2. For each parameter setting, 50 Monte  
173 Carlo trials were performed and the summary statistics were averaged over the 50 trials. The averaged  
174 summary statistics calculated for each parameter setting were visualized by interactive heat maps on a  
175 web-based visualization tool, the MASSIVE viewer. The MASSIVE viewer also displays single-cell  
176 mutation profiles from 5 of the 50 trial with the same parameter setting. For details, please refer to our  
177 methodological report (Niida et al., 2019). All the results in this study can be interactively explored in the  
178 MASSIVE viewer on our website (<https://www.hgc.jp/~niidan/canevosim>). Parameter  
179 values used for the MASSIVE analysis are provided in Table S1.

## 180 RESULTS

### 181 Driver model

182 First, we constructed the “driver” model, which contains only driver genes, aiming to study the two  
183 Darwinian selection processes: linear-replacing and driver-branching. We employed an agent-based  
184 model where each cell in a tumor is represented by an agent. The model starts from one cell without  
185 mutations. In a unit time, a cell divides into two daughter cells with a probability  $g$ . This model assumes  
186 that immortalized cell, which just divides without dying. In each cell division, each of the two daughter  
187 cells acquires  $k_d$  driver mutations. Here,  $k_d$  is sampled from a Poisson distribution with the parameter  
188  $m_d/2$ , i.e.,  $k_d \sim \text{Pois}(m_d/2)$ , which means that one cell division generates  $m_d$  mutations on average. We  
189 assumed that driver mutations acquired by different division events occur at different genomic positions  
190 and each cell can accumulate  $N_d$  mutations at maximum. In this study, we assumed that all mutations  
191 are driver mutations, which increase the cell division rate. When the cell acquires mutations, the cell  
192 division rate increases  $f$  fold per mutation; that is, when a cell has  $n_d (= \sum k_d)$  mutations in total, the  
193 cell division probability  $g$  is defined as  $g = g_0 f^{n_d}$ , where  $g_0$  is a base division probability. In each time  
194 step, every cell is subject to a cell division trial, which is repeated until population size  $p$  reaches  $P$  or  
195 the number of time steps  $t$  reaches  $T$ .

196 To examine the manner in which each parameter affects the evolutionary dynamics of the simula-  
197 tion model, we performed a sensitivity analysis utilizing MASSIVE (Niida et al., 2019), for which we  
198 employed a supercomputer. MASSIVE first performs a very large number of agent-based simulations  
199 with a broad range of parameter settings. The results are then intuitively evaluated by the MASSIVE  
200 viewer, which interactively displays heat maps of summary statistics and single-cell mutation profiles  
201 from the simulations with each parameter setting. In Figs. 2A-2C and Fig. S1, the heat maps of three  
202 representative summary statistics, the proportion of clonal mutations (clonal mutation proportion), a  
203 measure for ITH (Shannon index 0.05), and an indicator for the occurrence of the driver-branching  
204 process (driver-branching 0.05), are presented for a part of the parameter space examined. To calcu-  
205 late clonal mutation proportion, we defined the mutations having a frequency of 95% or more as  
206 clonal mutations. Shannon index 0.05 is the Shannon index calculated based on the proportions of  
207 different subclones (i.e., cell subpopulations with different mutations) after removing the mutations hav-  
208 ing a frequency less than 5%. The Shannon index is commonly used to measure species richness in  
209 community ecology, and it has a positive correlation with diversity. Similarly, after removing mutations  
210 having a frequency of less than 5%, we also checked whether multiple subclones harboring different  
211 driver mutations coexist, which is represented as a binary statistic, driver-branching 0.05. For each  
212 parameter setting, 50 Monte Carlo trials were performed and the summary statistics were averaged over  
213 the 50 trials. To examine ITH visually, we sampled 1000 cells from a simulated tumor and obtained a  
214 single-cell mutation profile matrix. The mutation profile matrix was visualized after reordering its rows  
215 and columns based on hierarchical clustering. The rows and columns index mutations and samples, re-  
216 spectively (Figs. 2D-2F). All the results can be interactively explored in the MASSIVE viewer on our  
217 website (<https://www.hgc.jp/~niidan/canevosim/driver>).

218 The results of the MASSIVE sensitivity analysis demonstrated that the strength of driver mutations  
219  $f$  is the most prominent determinant of the Darwinian selection processes (Fig. 2). A smaller value



220 of  $f$  (e.g.,  $f = 10^{0.3}$ ), which indicates weaker driver mutations, is generally associated with the driver-  
221 branching process, which is characterized by large driver-branching 0.05, corresponding to parameter  
222 setting D in Figs. 2A-2C. However, in the case of a low mutation rate (e.g.,  $m_d = 10^{-3}$ ), a small  $f$  value is  
223 insufficient to cause expansions of multiple clones, corresponding to parameter setting F in Figs. 2A-2C.  
224 When the value of  $f$  is large (e.g.,  $f = 10^{0.9}$ ), driver-branching 0.05 is small, but the clonal mutation  
225 proportion is large, which suggests that the linear-replacing process generates a homogeneous tumor,  
226 corresponding to parameter setting E in Figs. 2A-2C. By considering these results with time-course  
227 snapshots of the simulations, mechanisms driving the linear-replacing and driver-branching processes  
228 were intuitively interpreted (Fig. 3). Under the assumption of weak driver mutations, before a clone  
229 that has acquired the first driver mutation becomes dominant, other clones that have acquired different  
230 mutations expand, leading to the driver-branching process (Figs. 3A and 3B). In contrast, under the  
231 assumption of strong driver mutations, a clone that has acquired the first driver mutation rapidly expands  
232 to obtain more driver mutations serially, leading to the linear-replacing process (Figs. 3C and 3D).

233 The linear-replacing process is very similar to the fixation and selective sweep described in the stan-  
234 dard population genetics framework (Maynard Smith and Haigh, 1974; Ohta and Kimura, 1975). Note  
235 that, in a strict sense, fixation does not occur under the assumption that cancer cells are immortal  
236 (Sidow and Spies, 2015; Ohtsuki and Innan, 2017; Niida et al., 2018a); even if a tumor appears to be  
237 monoclonal in a mutation profile for 1000 randomly sampled cells, it is possible that minor clones hav-  
238 ing less fitness coexist in the actual population. In the driver-branching process, we observe various  
239 subclones that coexist in the population. They could compete with each other depending on their fitness.  
240 If different subclones obtain distinct driver mutations with very similar fitness effects independently, the  
241 competition between them will be neutral so that none of them can be fixed and they will keep compet-  
242 ing. This situation is similar to the phenomenon called “clonal interference” in an asexual population  
243 (Gerrish and Lenski, 1998).

244 In actual tumors, driver mutations can not only increase the growth rate but also decrease the death  
245 rate. To test the effect of driver mutations decreasing the death rate, we also created a modified ver-  
246 sion of the driver model, the “driver-d” model. In the driver-d model, each cell divides with a constant  
247 probability  $g_0$  and dies with a probability  $d$ . Driver mutation decreases the cell death probability by  
248  $f$  fold:  $d = d_0 e^{-n_d}$ , where  $d_0$  is the base death probability. Moreover, we assumed that cell death oc-  
249 curs only in the case of  $p > 1$ , to prevent the simulation from halting before clonal expansion. We  
250 applied the MASSIVE analysis to the driver-d model to find that, if a high mutation rate is assumed (i.e.,  
251  $m_d = 10^{-2}$ ), the driver-branching process is pervasive, irrespective of the strength of the driver mutations  
252 (Fig. S2; [https://www.hgc.jp/~niidan/canevosim/driver\\_d](https://www.hgc.jp/~niidan/canevosim/driver_d)). This observation is pre-  
253 sumably ascribed to the fact that a driver mutation that decreases the death rate cannot provide a cell with  
254 the strong growth advantage necessary for the linear-replacing process. Even if the mutation rate is low  
255 (i.e.,  $m_d = 10^{-4}$ ), multiple clones appear after the simulation proceeds to reach a sufficient population  
256 size. We also examined the evolutionary dynamics of the driver-d models with different mutation rates  
257 by taking time-course snapshots of the simulations (Fig. S3).

258 In both the driver and driver-d models, we do not consider spatial information. However, it should  
259 be noted that, by simulating tumor growth on a one-dimensional lattice, we demonstrated that the spatial  
260 bias of a resource necessary for cell divisions could prompt the driver-branching process (Niida et al.,  
261 2019).

## 262 Neutral model

263 Next, we examined the neutral-branching process by analyzing the “neutral” model, where we considered  
264 only neutral mutations that do not affect cell division and death. In a unit time, a cell divides into two  
265 daughter cells with a constant probability  $g_0$  without dying. Similarly to driver mutations in the driver  
266 model, in each cell division, each of the two daughter cells acquires  $k_n \sim \text{Pois}(m_n/2)$  neutral mutations.  
267 We assumed that neutral mutations acquired by different division events occur at different genomic  
268 positions and each cell can accumulate  $N_n$  mutations at maximum. In this study, we set  $N_n = 1000$ ,  
269 which is sufficiently large that no cell reaches the upper limit, except in a few exceptional cases. The  
270 simulation started from one cell without mutations and ended when population size  $p$  reached  $P$  or time  
271  $t$  reached  $T$ .

272 The MASSIVE analysis of the neutral model demonstrated that, as expected, the mutation rate is the  
273 most important factor for the neutral-branching process (Fig. 4; <https://www.hgc.jp/~niidan/canevosim/>

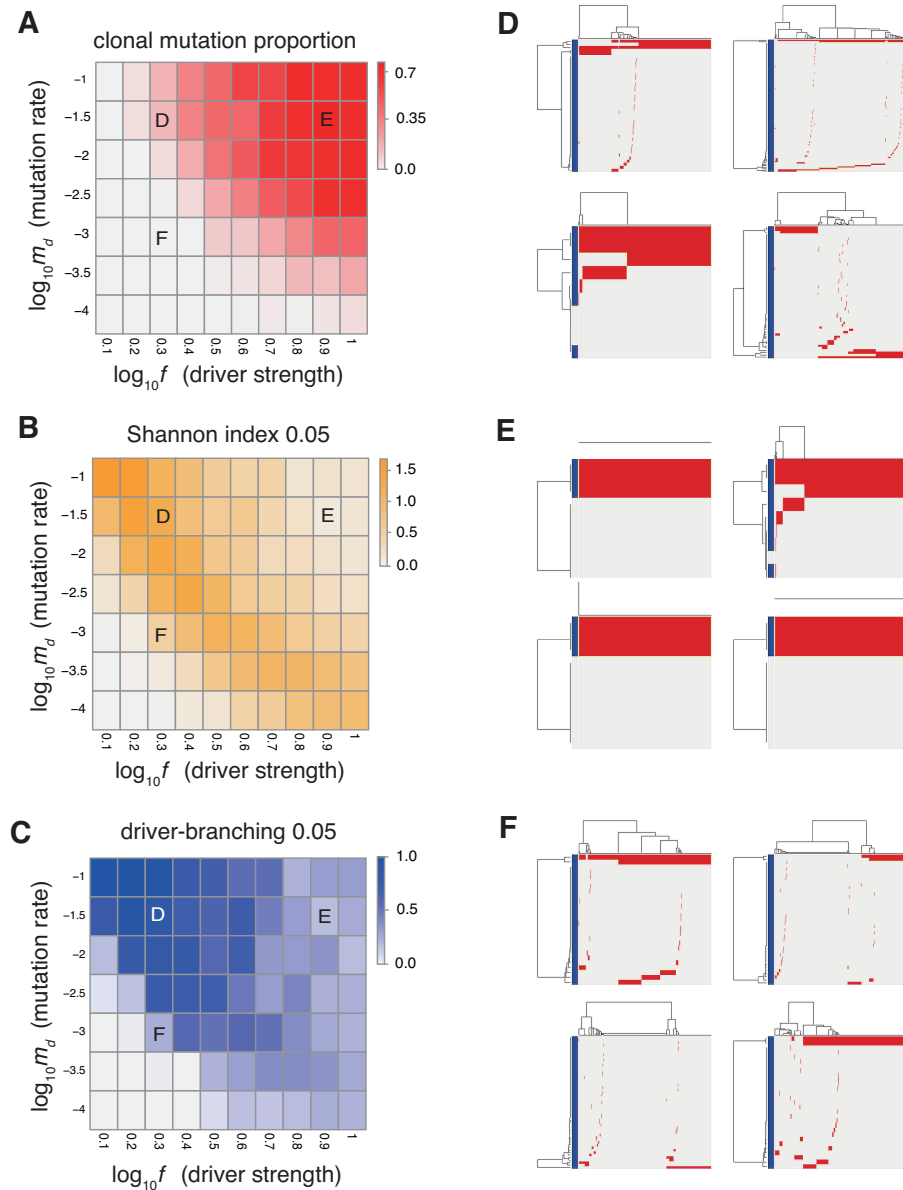

**Figure 2. Sensitivity analysis of the driver model.** While changing the driver mutation rate  $m_d$  and the strength of driver mutations  $f$ , heat maps of the summary statistics were prepared for the proportion of clonal mutations, clonal mutation proportion (A), a measure for ITH, Shannon index 0.05 (B), and an indicator for the occurrence of the driver-branching process, driver-branching 0.05 (C).  $N_d$  and  $P$  were set to 3 and  $10^5$ , respectively. (D-F) Single-cell mutations profiles obtained from four Monte Carlo trials with each of the three parameter settings, which are indicated on the heat maps presented in A-C. Rows and columns of the clustered single-cell mutations profile matrices denote mutations and cells, respectively. Blue side bars indicate driver mutations.

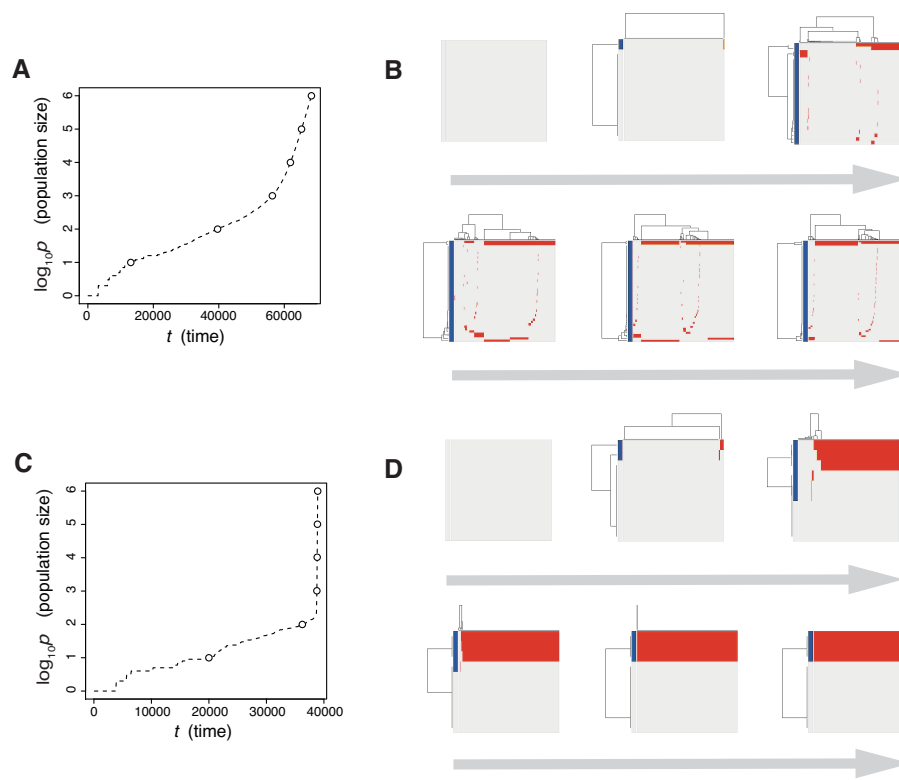

**Figure 3. Time-course snapshots of simulations based on the driver model.** Growth curve (A) and time-course snapshots of mutation profiles (B) simulated from the driver model with  $N_d = 3$ ,  $P = 10^6$ ,  $f = 10^{0.3}$ , and  $m_d = 10^{-1.5}$  (corresponding to parameter setting D in Figs. 2A-2C). Growth curve (C) and time-course snapshots of mutation profiles (D) simulated from the driver model with  $N_d = 3$ ,  $P = 10^6$ ,  $f = 10^{0.9}$ , and  $m_d = 10^{-1.5}$  (corresponding to parameter setting E in Fig. 2A-2C). The time points when snapshots were obtained are indicated by empty circles on the growth curves.

274 note that the neutral model is included by the neutral-s model, which is described below). When the mean  
 275 number of mutations generated by per cell division,  $m_n$ , was less than 1, the neutral model just gener-  
 276 ated sparse mutation profiles with relatively small values of the ITH score, Shannon index 0.05. In  
 277 contrast, when  $m_n$  exceeded 1, the mutation profiles presented extensive ITH, which are characterized  
 278 by a fractal-like pattern and large values of the ITH score (hereinafter, this type of ITH is referred to  
 279 as “neutral ITH”). According to these results, it is intuitively supposed that neutral ITH is shaped by  
 280 neutral mutations that trace the cell lineages in the simulated tumors. Note that the mutation profiles  
 281 were visualized after filtering out low-frequency mutations. Under the assumption of a high mutation  
 282 rate, more numerous subclones having different mutations should be observed if we count the mutations  
 283 existing with lower frequencies.

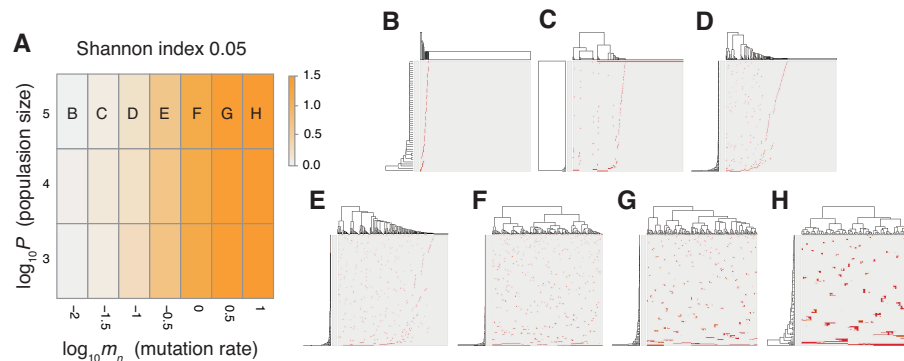

**Figure 4. Sensitivity analysis of the neutral model.** (A) Heat map obtained by calculating Shannon index 0.05 while changing the neutral mutation rate  $m_n$  and the maximum population size  $P$ . (B-H) Single-cell mutations profiles obtained for seven parameter settings, which are indicated on the heat map in A.

284 To verify this speculation, we counted the number of subclones generated from a simulated tumor,  
 285 while varying the frequency cutoffs for filtering out mutations. Fig. S4 shows the plot of the relationship  
 286 between the number of subclones and the frequency cutoffs. As expected, the results indicate that the  
 287 simulated tumor presents an increasing number of subclones as the frequency cutoff is lowered. The lin-  
 288 earity of the log-log plot demonstrates that the power law is hidden in the mutation profile, consistently  
 289 with its fractal-like pattern (Brown et al., 2002). Note that, although the ITH score does not depend  
 290 on population size  $P$  and the fractal-like pattern shaped in the earliest stage appears to be subsequently  
 291 unchanged in the time-course snapshots (Fig. 5), these are also because low-frequency mutations were  
 292 filtered out before visualization; the simulated tumor in fact expands neutral ITH by accumulating nu-  
 293 merous low-frequency mutations as it grows.

294 Thus far, several theoretical and computational studies have shown that a stem cell hierarchy can  
 295 boost the neutral-branching process (Sottoriva et al., 2010; Solé et al., 2008), which prompted us to ex-  
 296 tend the neutral model to the “neutral-s” model such that it contains a stem cell hierarchy (Fig. S5). The  
 297 neutral-s model assumes that two types of cell exist: stem and differentiated. Stem cells divide with a  
 298 probability  $g_0$  without dying. For each cell division of stem cells, a symmetrical division generating two  
 299 stem cells occurs with a probability  $s$ , while an asymmetrical division generating one stem cell and one  
 300 differentiated cell occurs with a probability  $1 - s$ . A differentiated cell symmetrically divides to gener-  
 301 ate two differentiated cells with a probability  $g_0$  but dies with a probability  $d_0^d$ . The means of accumulat-  
 302 ing neutral mutations in the two types of cell is the same as that in the original neutral model, which means  
 303 that the neutral-s model is equal to the original neutral model when  $s = 0$  or  $d_0^d = 0$ . For convenience,  
 304 we define  $\delta = \log_{10}(d_0^d/g_0)$  and hereinafter use  $\delta$  instead of  $d_0^d$ .

305 The MASSIVE analysis of the neutral-s model confirmed that the incorporation of the stem cell hi-  
 306 erarchy boosts the neutral-branching process  
 307 ([https://www.hgc.jp/~niiyan/canevosim/neutral\\_s](https://www.hgc.jp/~niiyan/canevosim/neutral_s)). To obtain the heat map in Fig. 6A,  
 308 the ITH score was measured while  $d_0^d$  and  $\delta$  were changed, but  $m_n = 0.1$  and  $P = 1000$  were constantly  
 309 set. In the heat map, a decrease of  $s$  leads to an increase in the ITH score when  $\delta \geq 0$  (i.e.,  $d_0^d \geq g_0$ ). A

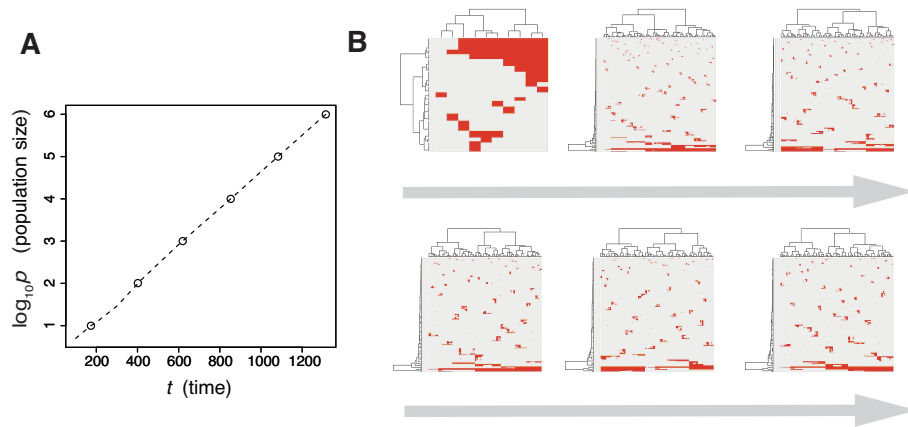

**Figure 5. Time-course snapshots of simulations based on the neutral model.** Growth curve (A) and time-course snapshots of mutation profiles (B) simulated from the driver model with  $P = 10^6$  and  $m_n = 10$  (corresponding to parameter setting H in Fig. 4A). The time points when snapshots were obtained are indicated by empty circles on the growth curves.

310 smaller value of  $s$  means that more differentiated cells are generated per stem cell division, and  $\delta \geq 0$   
 311 means that the population of the differentiated cells cannot grow in total, which is a valid assumption  
 312 for typical stem cell hierarchy models. That is, this observation indicates that the stem cell hierarchy  
 313 can induce neutral ITH even with a relatively low mutation rate setting (i.e.,  $m_n = 0.1$ ), with which the  
 314 original neutral model cannot generate neutral ITH.

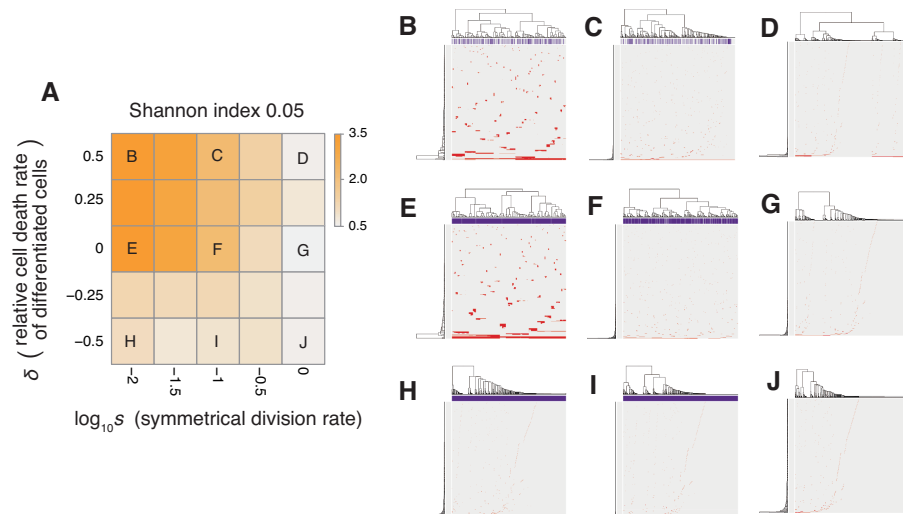

**Figure 6. Sensitivity analysis of the neutral-s model.** (A) Heat map obtained by calculating Shannon index 0.05 while changing the relative death rate of differentiated cells  $\delta = \log_{10}(d_0^d/g_0)$  and the symmetrical division rate  $s$ . The neutral mutation rate  $m_n$  and the maximum population size  $P$  set to  $10^{-1}$  and  $10^5$ , respectively. (B-J) Single-cell mutation profiles obtained for nine parameter settings, indicated on the heat map presented in A.

315 The underlying mechanism boosting the neutral-branching process can be explained as follows. We  
 316 here consider only stem cells for an approximation, because differentiated cells do not contribute to tumor  
 317 growth with  $\delta \geq 0$ . While one cell grows to a population of  $P$  cells, let cell divisions synchronously  
 318 occur across  $x$  generations during the clonal expansion. Then,  $(1 + s)^x = P$  holds, because the mean  
 319 number of stem cells generated per cell division is estimated as  $1 + s$ . Solving the equation for  $x$  gives

320  $x = \log P / \log(1 + s)$ ; that is, it can be estimated that, during the clonal expansion, each of the  $P$  cells  
321 experiences  $\log P / \log(1 + s)$  cell divisions and accumulates  $m_n \log P / 2 \log(1 + s)$  mutations on average.  
322 We confirmed that the expected mutation count based on this formula is well fit with the values observed  
323 in our simulation, except in the exceptional cases where the mutation counts reached the upper limit,  
324  $N_n = 1000$  (Fig. S6). These arguments mean that a tumor with a stem cell hierarchy accumulates more  
325 mutations until reaching a fixed population size than does a tumor without a stem cell hierarchy. That is,  
326 a stem cell hierarchy increases the apparent mutation rate by  $\log 2 / \log(1 + s)$  folds, which induces the  
327 neutral-branching process even with relatively low mutation rate settings.

328 Similarly, we can also show that the introduction of cell death to the neutral model boosts the neutral-  
329 branching process. In the neutral model having a non-zero death rate  $d_0$ , we estimate that the mean  
330 number of cells generated per cell division is  $2 - d_0 / g_0$ . Through arguments similar to the one above, we  
331 can also show that the apparent mutation rate is increased by  $\log 2 / \log(2 - d_0 / g_0)$ . Collectively, although  
332 the mutation rate is the most important determinant for generating neutral ITH, the introduction of cell  
333 death as well as stem cell hierarchy also contribute to the neutral-branching process by increasing the  
334 apparent mutation rate.

### 335 **Combining the driver and neutral model**

336 We now present the “composite” model that was constructed by combining the driver and neutral model,  
337 aiming to reproduce ITH more similar to those in real tumors. In a unit time, a cell divides into two daugh-  
338 ter cells with a constant probability  $g$  without dying. In each cell division, each of the two daughter cells  
339 acquires  $k_d \sim \text{Pois}(m_d/2)$  driver mutations and  $k_n \sim \text{Pois}(m_n/2)$  neutral mutations. For each type of mu-  
340 tation,  $N_d$  and  $N_n$  mutations can be accumulated at maximum. For a cell that has  $n_d (= \sum k_d)$  mutations,  
341 cell division probability  $g$  is defined as  $g = g_0 f^{n_d}$ , where  $g_0$  is a base division probability. The simula-  
342 tion started from one cell without mutations and ended when the population size  $p$  reached  $P$  or time  $t$   
343 reached  $T$ . As expected from the MASSIVE analyses of the driver and neutral model that were performed  
344 separately, our MASSIVE analysis of the composite model confirmed that, depending on the parameter  
345 setting, behaviors of the composite model and the resultant mutation profiles are roughly categorized into  
346 the following six classes (Fig. 7; <https://www.hgc.jp/~niiyan/canevosim/composite>):

- 347 • With small  $m_d$  and small  $m_n$ , i.e., with low driver and neutral mutation rates, no evolutionary  
348 process involving driver and neutral mutations occurs.
- 349 • With large  $m_d$ , small  $m_n$ , and small  $f$  (i.e., with high driver and low neutral mutation rates, and  
350 weak driver mutations), the driver-branching occurs while the neutral-branching process does not  
351 occur.
- 352 • With large  $m_d$ , small  $m_n$ , and large  $f$  (i.e., with high driver and low neutral mutation rates, and  
353 strong driver mutations), the linear-replacing process occurs while the neutral-branching process  
354 does not occur.
- 355 • With small  $m_d$  and large  $m_n$  (i.e., with low driver and high neutral mutation rates), the neutral-  
356 branching process occurs while no evolutionary process involving driver mutations occurs.
- 357 • With large  $m_d$ , large  $m_n$ , and small  $f$  (i.e., with low driver and high neutral mutation rates, and  
358 weak driver mutations), the driver-branching and neutral-branching processes occur simultane-  
359 ously.
- 360 • With large  $m_d$ , large  $m_n$ , and large  $f$  (i.e., with high driver and high neutral mutation rates, and  
361 strong driver mutations), the linear-replacing and neutral-branching processes occur simultane-  
362 ously.

363 Note that, because tumors having high driver mutation rates must have high neutral mutation rates  
364 also, the linear-replacing and driver-branching processes must in general be accompanied by the neutral-  
365 branching process. Therefore, the last three behaviors are supposed to constitute the process that can  
366 actually occur in real tumors (note that, since different processes work simultaneously and continuously  
367 as a series of phases of cancer evolution in real tumors as described below, the situation is not so simple).

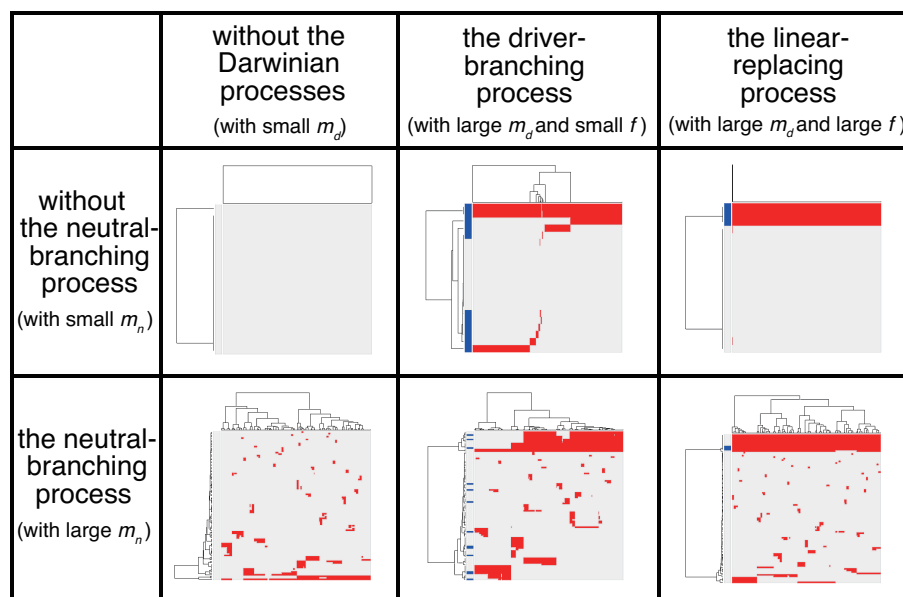

**Figure 7. Six classes of mutation profiles simulated by the composite model.** Our sensitivity analysis demonstrated that, depending on the parameter setting, behaviors of the composite model are roughly categorized into the six classes. Representative mutation profiles of the six classes are presented.

### 368 Adding the punctuated-replacing process

369 Previously, we analyzed multiregion sequencing data of advanced colorectal cancer and precancerous  
 370 lesions jointly to demonstrated that the evolutionary principle generating ITH shifts from the driver- to  
 371 neutral-branching process during colorectal tumorigenesis (Saito et al., 2018). We also demonstrated  
 372 that the number of copy number alterations drastically increases during the progression from colorectal  
 373 precancerous lesions to advanced colorectal cancer, which prompted us to suspect that the punctuated-  
 374 replacing process underlies the evolutionary shift from branching to the neutral-branching process (Fig. 1E).  
 375 To examine this possibility, we additionally incorporated the punctuated-replacing process into the com-  
 376 posite model to build the “punctuated” model.

377 For the models considered thus far, we assumed that a cell can infinitely grow without a decrease  
 378 in their growth speed. However, it is more natural to assume that there exists a limit of population size  
 379 because of the resource limitation and that the growth speed gradually slows down as the population  
 380 size approaches the limit. The limit of population sizes is called the carrying capacity and employed  
 381 in the well-known logistic equation (Verhulst, 1838). By mimicking the logistic equation, we modified  
 382 the division probability as  $g = g_0 f^{n_d} (1 - p/p_c)$ , where  $p_c$  is the carrying capacity. To reproduce the  
 383 punctuated-replacing process, we additionally employ an “explosive” driver mutation, which negates  
 384 the effect of the carrying capacity. After a cell accumulates driver mutations up to the maximum  $N_d$ ,  
 385 the explosive driver mutation is introduced at a probability  $m_e$  after cell division. For a cell that has  
 386 the explosive driver mutation, the carrying capacity  $p_c$  is set to infinite; That is, it is assumed that the  
 387 explosive driver mutation rapidly evolves the cell so that it can conquer the growth limit and attain infinite  
 388 proliferation ability.

389 Next, we searched for parameter settings that lead the punctuated model to reproduce the punctuated-  
 390 replacing process. The MASSIVE analysis confirmed that, with sufficiently large  $m_e$  (i.e.,  $m_e > 10^{-4}$ ),  
 391 the punctuated-replacing process is reproducible in the punctuated model (<https://www.hgc.jp/~niiyan/can>  
 392 note that, for simplicity, we omitted neutral mutations by setting  $m_n = 0$  in the MASSIVE analysis). We  
 393 also examined time-course snapshots of simulations conducted with these parameter settings. In the  
 394 example shown in Figs. 8A and 8B, we observed that multiple subclones having different driver genes  
 395 coexist; that is, the driver-branching process, with which the neutral-branching process occurs simulta-  
 396 neously, is prominent during the early phase of the simulation. Note that a growth curve plot indicates



397 that, as the population size approaches the carrying capacity, the growth speed slows down; however,  
398 the tumor regrows after the appearance of a clone that has acquired an explosive driver mutation. The  
399 clone with the explosive driver mutation is then subjected to a selective sweep, which causes subclonal  
400 driver mutations in the clone to shift to clonal mutations. Then, only neutral mutations are accumulated  
401 as subclonal mutations; That is, ITH is finally generated by the neutral-branching process.

402 We also found that two subclones having different subclonal driver mutations sometimes appear  
403 by obtaining two independent explosive driver mutations (Figs. 8C and 8D). This observation recalls  
404 by mind the multiverse model, which was proposed for glioblastoma evolution (Lee et al., 2017). The  
405 multiverse model is derived from the Big-Bang model, a model for jointly describing punctuated and the  
406 neutral-branching process during colorectal tumorigenesis (Sottoriva et al., 2015). The Big-Bang model  
407 assumes that a single clone explosively expands from a precancerous lesion while generating neutral  
408 ITH, consistently with our evolutionary shift model. However, in the multiverse model, it is assumed  
409 that multiple subclones are subject to explosive expansion. Collectively, our simulation based on the  
410 punctuated model not only supports our hypothesis that the punctuated-replacing process underlies the  
411 evolutionary shift during colorectal tumorigenesis, but also can reproduce multiple types of punctuated  
412 models proposed thus far.

413 Our simulation based on the punctuated model also demonstrated a dramatic evolution of cancer,  
414 during which multiple processes could go on simultaneously and continuously, and we observed different  
415 phases along the evolution. Consequently, the mutation profile records the history of the processes  
416 such that a series of multiple phases arises with different patterns of mutation profiles. It is possible  
417 that we infer the history from the mutation profile at the end point to some degree; for example, the  
418 accumulation of clonal driver mutations suggests that the tumor has been subjected to the linear- or  
419 punctuated-replacing process. However, our result emphasizes the importance of having a time-series  
420 data to fully understand the detailed process behind cancer evolution (Sato et al., 2019).

## 421 DISCUSSION

422 In the Results section, we introduced a family of simulation models that reproduce the four types of  
423 cancer evolutionary processes: linear-replacing, driver-branching, neutral-branching, and punctuated-  
424 replacing. Our sensitivity analysis of these models successfully identified the conditions leading to  
425 each of the evolutionary processes. For example, under the assumption of a sufficiently high mutation  
426 rate, the driver-branching process occurs with strong driver mutations, whereas linear evolution occurs  
427 with weak driver mutations. However, a major concern about our sensitivity analysis is whether the  
428 ranges of parameter values examined is realistic. Although dependent on tumor types, the number of  
429 driver mutations were previously estimated as in the low single digits for most tumor types, consistently  
430 with our settings for  $d$ . As the increase in the cell division probability per driver mutation  $f$ , which is  
431 interpreted as the strength of driver mutations, we examined values ranging from  $10^{0.1}$  to  $10^{1.0}$ . Although  
432 the value of  $f$  has not been the subject to extensive experimental determination, it has been reported that  
433 the induction of K-ras<sup>G12D</sup> in murine small intestine increases growth rate from one cell cycle per 24 hr  
434 to one cell cycle per 15 hr, from which  $f$  is estimated as  $10^{0.204}$  (Snippert et al., 2014).

435 The driver mutation rate  $m_d$  and population size  $P$  appear to be problematic. Although the driver mu-  
436 tation rate was previously estimated as  $\sim 3.4 \times 10^{-5}$  per cell division (Bozic et al., 2010), our sensitivity  
437 analysis examined values from  $10^{-4}$  to  $10^{-1}$ , which are above the estimated value by orders of magni-  
438 tude. It should also be noted that, in our simulation, it was assumed that a tumor contains  $10^6$  cells at  
439 maximum, whereas the number of cancer cells in one gram of tumor tissue is reportedly  $10^9$  or one order  
440 less (Del Monte, 2009). Clearly, for  $m_d$  and  $P$ , the parameter space we examined does not cover those  
441 for a real tumor. However, the results of the MASSIVE analysis allow the behaviors of the driver model  
442 to be envisioned in a realistic parameter space. When  $P$  is small, neither the linear-replacing process nor  
443 the driver-branching process occurs. As  $P$  increases, we observe the linear-replacing or driver-branching  
444 process with smaller  $m_d$ , although the range of  $f$  that leads to the driver-branching process shifts to larger  
445 values. Moreover, as shown by the sensitivity analysis of the neutral-s model, the presence of a stem cell  
446 hierarchy increases the apparent mutation rate. Therefore, a real tumor having a stem cell hierarchy  
447 apparently should have a higher  $m_d$  value. Collectively, it is natural to assume that a real tumor having  
448 large  $P$  and small  $m_d$  can be similarly generated by the linear-replacing or driver-branching process ,  
449 although, in such cases, the actual value of  $f$  might be larger than those that we examined.

450 The sensitivity analysis of the neutral model showed that neutral ITH is generated if the expected

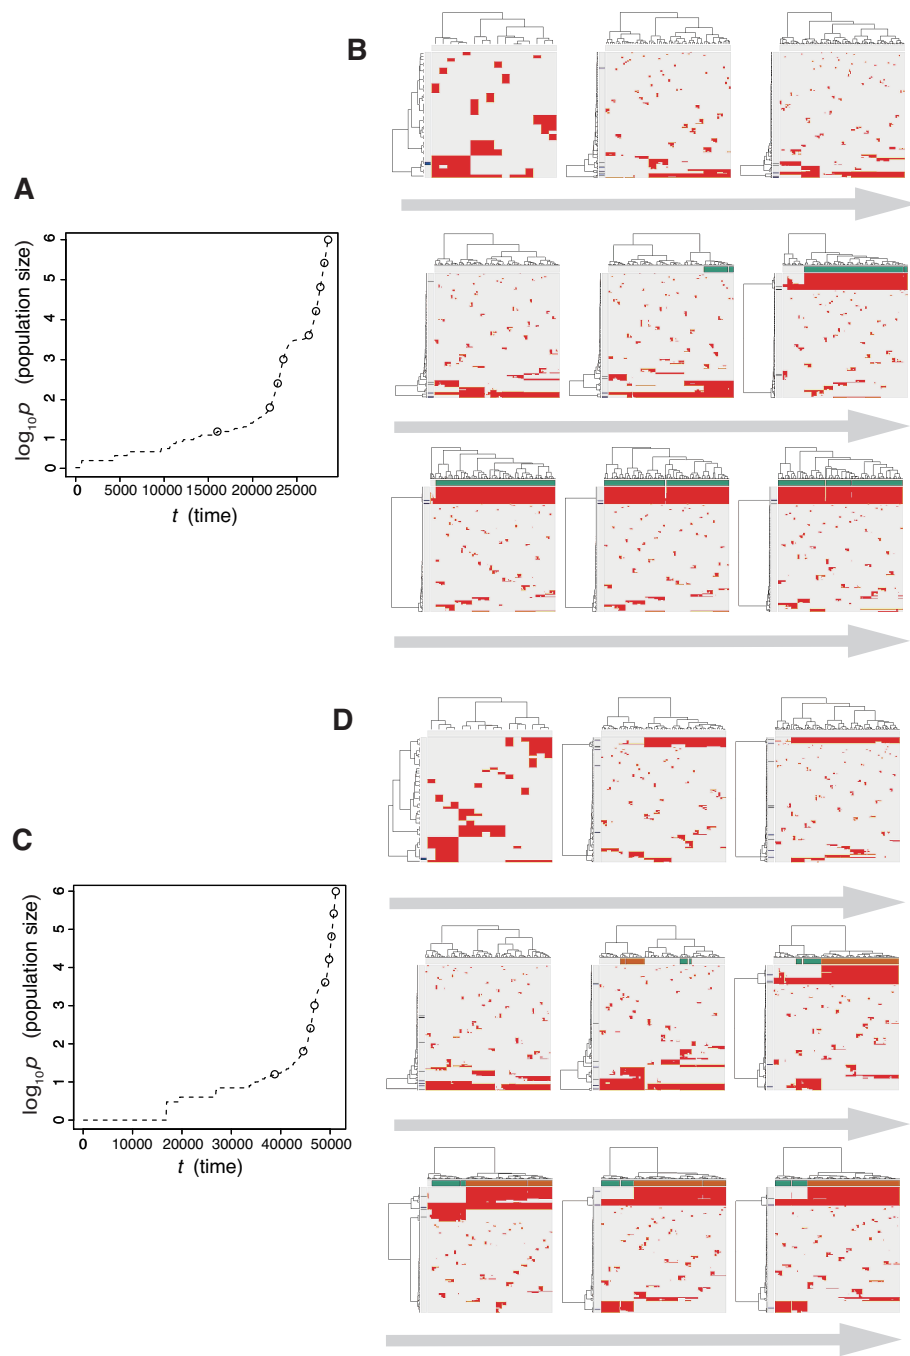

**Figure 8. Time-course snapshots of simulations based on the punctuated model.** Growth curve (A) and time-course snapshots of mutation profiles (B) simulated from the punctuated model with  $P = 10^6$ ,  $p_c = 10^{3.5}$ ,  $m_d = 10^{-1}$ ,  $m_p = 10^{0.5}$ , and  $m_e = 10^{-4}$ . Growth curve (C) and time-course snapshots of mutation profiles (D) simulated from the punctuated model with  $P = 10^6$ ,  $p_c = 10^{3.5}$ ,  $m_d = 10^{-1}$ ,  $m_p = 10^{0.5}$ , and  $m_e = 10^{-3}$ . The time points when snapshots were obtained are indicated by empty circles on the growth curves.

451 number of neutral mutations generated per cell division,  $m_n$ , exceeds 1. In a recent report, the estimated  
452 somatic mutation rate was given as  $2.66 \times 10^{-9}$  mutations per base pair per mitosis. Given that most  
453 mutations are neutral on the human genome comprised of  $3 \times 10^9$  bases, even a cell division of normal  
454 cells generates more than 1 neutral mutation. As cancer cells should have higher mutation rates, which  
455 can be further accelerated by stem cell hierarchies, it is reasonable to assume that a tumor in general  
456 satisfies the conditions to generate neutral ITH. However, not every tumor necessarily has neutral ITH;  
457 neutral ITH is distorted by natural selection if the tumor additionally satisfies the conditions for the  
458 driver-branching process, as shown by the analysis employing the composite model.

459 A highlight of this work is that the punctuated model demonstrated that the punctuated-replacing pro-  
460 cess triggers the evolutionary shift from branching to the neutral-branching process. For carrying capac-  
461 ity  $p_c$  and the probability of acquiring an explosive mutation  $m_e$  in the punctuated model, the parameter  
462 values that we examined are clearly outside realistic ranges. Similarly to  $P$ ,  $p_c$  should take a larger value.  
463 Although it cannot easily be experimentally determined,  $m_e$  also appears to be overestimated; al-  
464 though the human body in fact potentially harbors numerous precancerous lesions (Brunner et al., 2019;  
465 Yokoyama et al., 2019), which are assumed not to have acquired explosive driver mutations yet, only a  
466 tiny fraction of cases progresses to advanced stages by acquiring explosive driver mutations. However, it  
467 is intuitively understandable that the behaviors of the punctuated model, as well as of the driver model,  
468 are not dependent on precise values of these parameters, and in our opinion our analysis is sufficient to  
469 provide a semi-quantitative understanding of cancer evolution.

470 The models we introduced in the Results section can be described collectively as the unified model,  
471 a formal description of which is provided in the Materials & Methods section. The unified model is  
472 very simple but sufficient to reproduce the linear-replacing, driver-branching, neutral-branching, and  
473 punctuated-replacing processes. Of course, the unified model harbors many limitations, which should  
474 be addressed in future studies. Our current version of the model completely ignores spatial information,  
475 which potentially influences evolutionary dynamics. Recently reported studies have shown that spatial  
476 structures regulate evolutionary dynamics in tumors (Noble et al., 2019; West et al., 2019). We also  
477 determined that resource bias prompts the driver-branching process, by simulating tumor growth on a  
478 one-dimensional lattice (Niida et al., 2019). Moreover, Iwasaki and Innan (2017) recently developed  
479 a realistic simulator called tumopp to show that the three-dimensional pattern of ITH is affected by  
480 the local cell competition and asymmetric stem cell division. Although our model assumed that driver  
481 mutations independently have effects of equal strength, different driver mutations should have different  
482 strengths and might work synergistically (Castro-Giner et al., 2015). Similarly, although we assumed  
483 that the punctuated-replacing process occurs only once in the course of cancer evolution, it is possible  
484 that a tumor is confronted with different types of resource limitations during the tumor progression and  
485 undergoes the punctuated-replacing process multiple times to conquer them (Aktipis et al., 2013).

## 486 CONCLUSION

487 Although the unified model harbors the above-described limitations, the application of sensitivity anal-  
488 ysis to the model has successfully provided a number of insights into cancer evolutionary dynamics.  
489 In our opinion the unified model serves as a starting point for constructing more realistic simulation  
490 models to understand in greater depth the diversity of cancer evolution, which is being unveiled by the  
491 ever-growing amount of cancer genomics data.

492 SUPPORTING INFORMATION

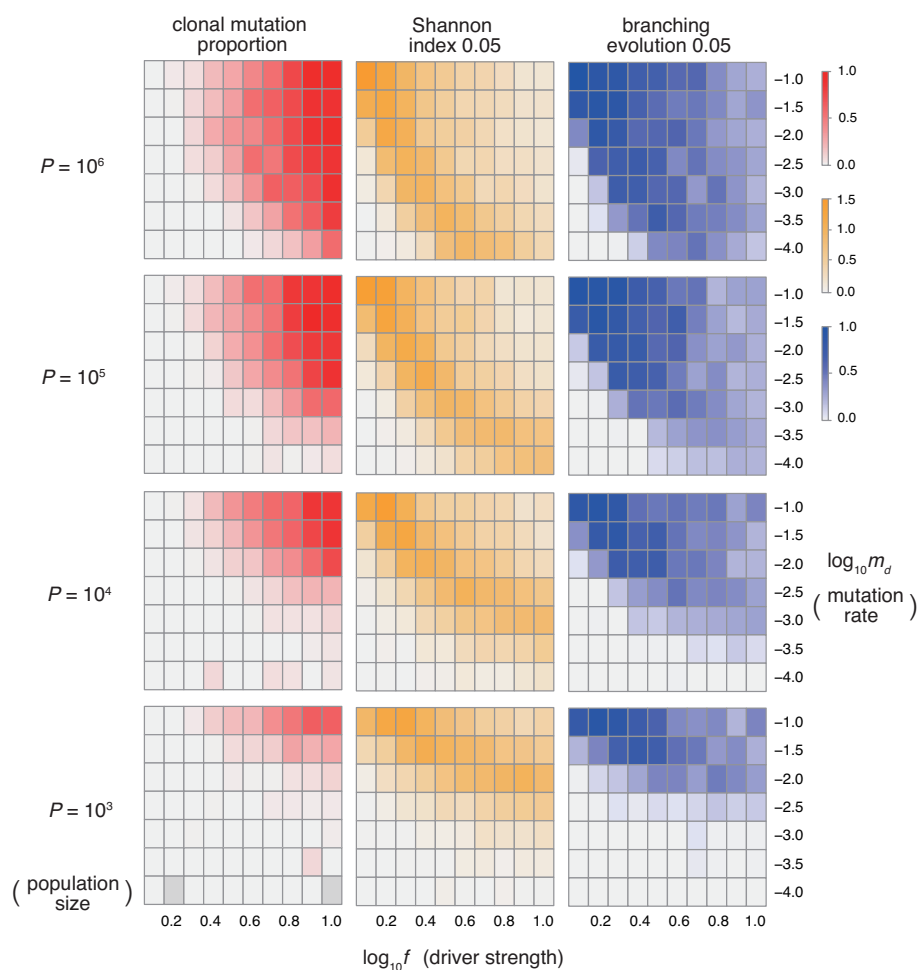

**Figure S1. Sensitivity analysis of the driver model.** While changing the driver mutation rate  $m_d$ , the strength of driver mutations  $f$ , and the maximum population size  $P$ , heat maps of the summary statistics were prepared for the proportion of clonal mutations, clonal mutation proportion (A), a measure for ITH, Shannon index 0.05 (B), and an indicator for the occurrence of the driver-branching process, driver-branching 0.05 (C).  $N_d$  was set to 3.

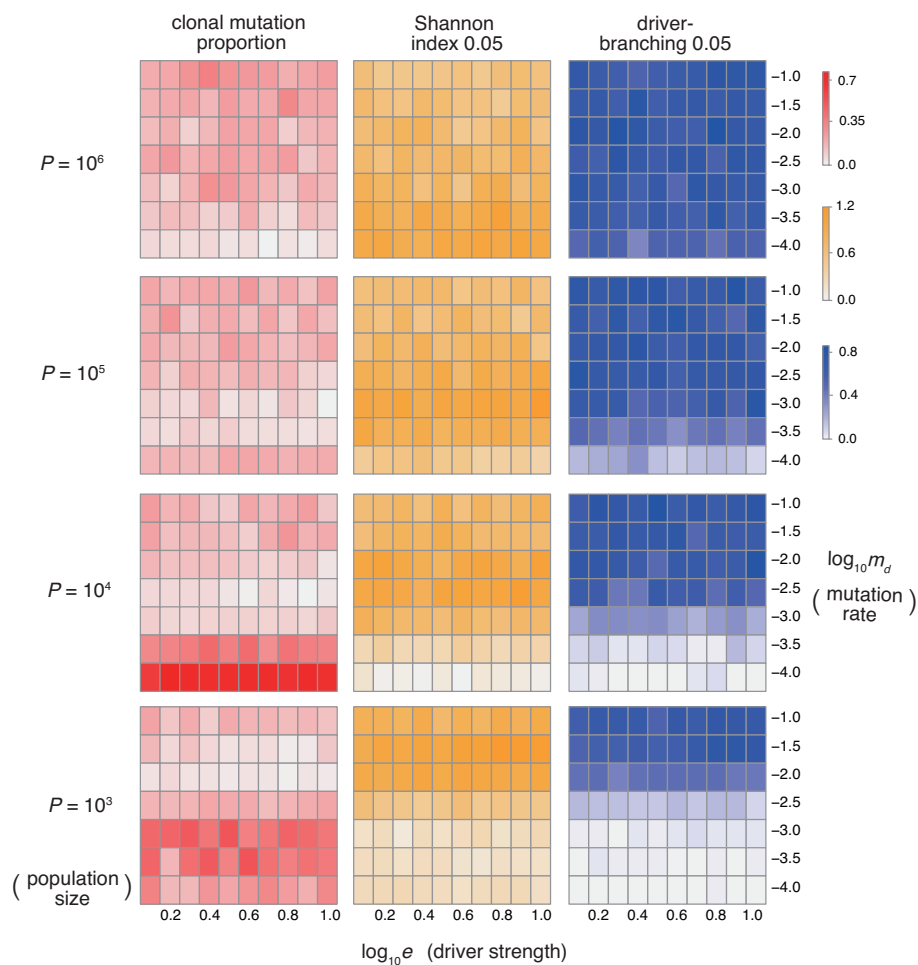

**Figure S2. Sensitivity analysis of the driver-d model.** While changing the driver mutation rate  $m_d$ , the strength of driver mutations  $e$ , and the maximum population size  $P$ , heat maps of the summary statistics were prepared for the proportion of clonal mutations, clonal mutation proportion (A), a measure for ITH, Shannon index 0.05 (B), and an indicator for the occurrence of the driver-branching process, driver-branching 0.05 (C).  $N_d$  was set to 3.

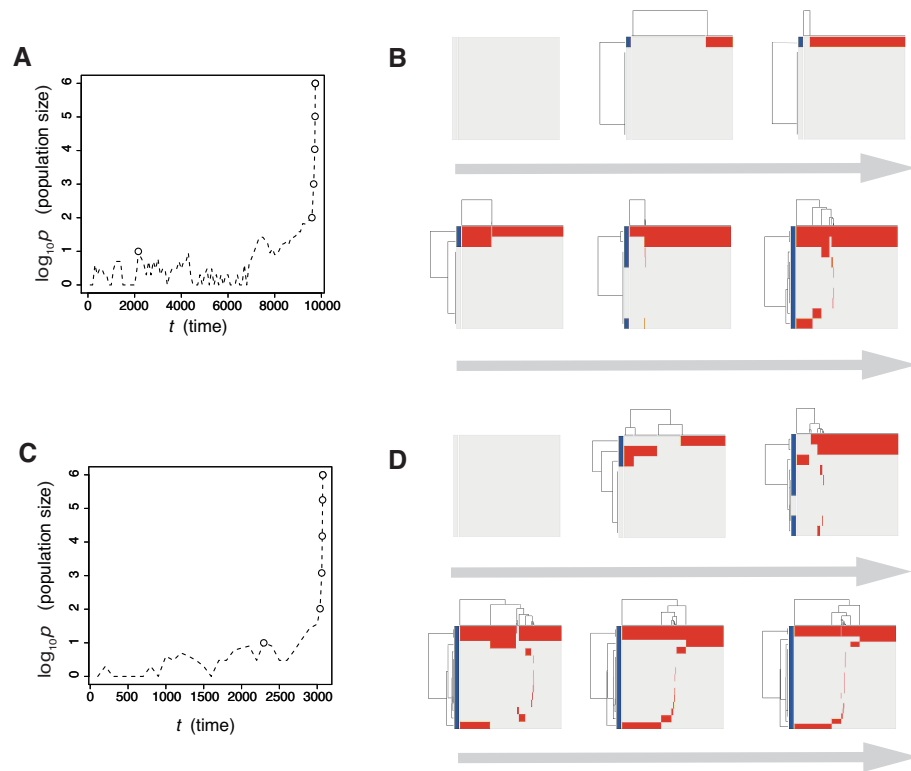

**Figure S3. Time-course snapshots of simulations based on the driver-d model.** Growth curve (A) and time-course snapshots of mutation profiles (B) simulated from the driver model with  $N_d = 3$ ,  $P = 10^6$ ,  $e = 10^{0.5}$ , and  $m_d = 10^{-4}$  (a low mutation rate setting). Growth curve (C) and time-course snapshots of mutation profiles (D) simulated from the driver model with  $N_d = 3$ ,  $P = 10^6$ ,  $e = 10^{0.5}$ , and  $m_d = 10^{-2}$  (a high mutation rate setting). The time points when the snapshots were obtained are indicated by empty circles on the growth curves.

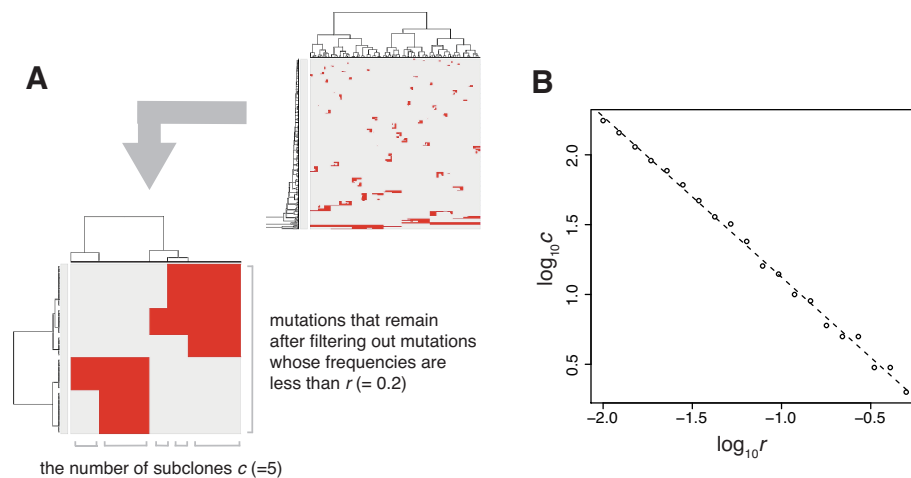

**Figure S4. Self-similarity of neutral ITH.** (A) Illustrative explanation of the preparation of the log-log plot presented in (B). After mutations having frequencies less than  $r$  are filtered out, the number of subclones  $c$  is counted based on the mutation profiles. (B) Log-log plot for  $r$  and  $c$  obtained from a simulation with  $P = 10^5$  and  $m_n = 10$ . Similar linearity holds when  $m_n \geq 1$ .

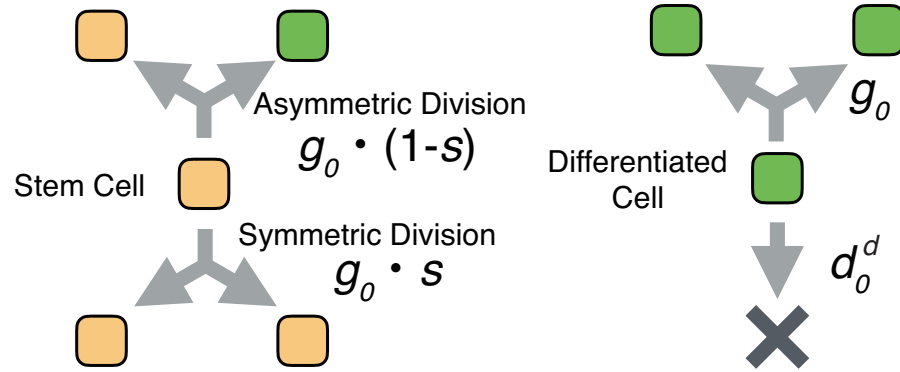

**Figure S5. Schema of the neutral-s model.** Stem cells divide with a probability  $g_0$  without dying. For each cell division of stem cells, a symmetrical division generating two stem cells occurs with probability  $s$ , while an asymmetrical division generating one stem cell and one differentiated cell occurs with probability  $1 - s$ . A differentiated cell symmetrically divides to generate two differentiated cells with probability  $g_0$  but dies with probability  $d_0^d$ .

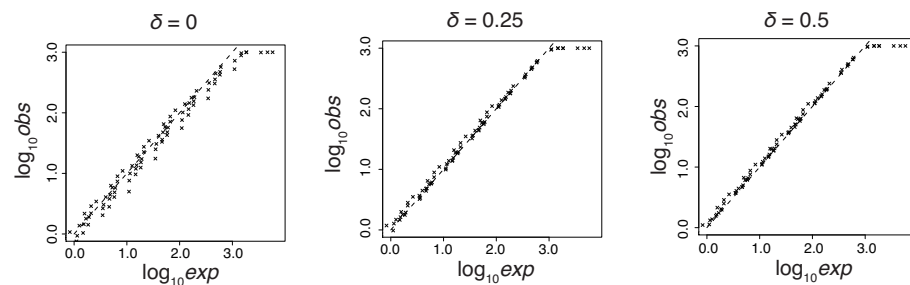

**Figure S6. Observed and expected mutation counts from the neutral-s model.** The observed mutation counts (*obs*) were prepared from values of mutation count per cell in the MASSIVE analysis, while the expected mutation counts (*exp*) were analytically estimated as  $m_n \log P / 2 \log(1 + s)$  under the assumption that  $\delta \geq 0$ . Each cross representing each parameter setting was plotted in log10 scale for different values of  $\delta$ . Positioning on the dashed line indicates the equality of the observed and expected mutation counts.

## 493 ACKNOWLEDGMENT

494 We thank Hiroshi Haeno and Watal M. Iwasaki for helpful discussions.

## 495 REFERENCES

- 496 Aktipis, C. A., Boddy, A. M., Gatenby, R. A., Brown, J. S., and Maley, C. C. (2013). Life history  
497 trade-offs in cancer evolution. *Nature Reviews Cancer*, 13(12):883.
- 498 Altrock, P. M., Liu, L. L., and Michor, F. (2015). The mathematics of cancer: integrating quantitative  
499 models. *Nature Reviews Cancer*, 15(12):730.
- 500 Baca, S., Prandi, D., Lawrence, M., Mosquera, J., Romanel, A., Drier, Y., Park, K., Kitabayashi, N.,  
501 MacDonald, T., Ghandi, M., Van, A. E., Kryukov, G., Sboner, A., Theurillat, J., Soong, T., Nickerson,  
502 E., Auclair, D., Tewari, A., Beltran, H., Onofrio, R., Boysen, G., Guiducci, C., Barbieri, C., Cibulskis,  
503 K., Sivachenko, A., Carter, S., Saksena, G., Voet, D., Ramos, A., Winckler, W., Cipicchio, M., Ardlie,  
504 K., Kantoff, P., Berger, M., Gabriel, S., Golub, T., Meyerson, M., Lander, E., Elemento, O., Getz, G.,  
505 Demichelis, F., Rubin, M., and Garraway, L. (2013). Punctuated evolution of prostate cancer genomes.  
506 *Cell*, 153(3):666–677.



- 507 Beerenwinkel, N., Schwarz, R. F., Gerstung, M., and Markowitz, F. (2014). Cancer evolution: mathe-  
508 matical models and computational inference. *Systematic biology*, 64(1):e1–e25.
- 509 Bozic, I., Antal, T., Ohtsuki, H., Carter, H., Kim, D., Chen, S., Karchin, R., Kinzler, K. W., Vogel-  
510 stein, B., and Nowak, M. A. (2010). Accumulation of driver and passenger mutations during tumor  
511 progression. *Proceedings of the National Academy of Sciences*, 107(43):18545–18550.
- 512 Brown, J. H., Gupta, V. K., Li, B.-L., Milne, B. T., Restrepo, C., and West, G. B. (2002). The fractal  
513 nature of nature: power laws, ecological complexity and biodiversity. *Philosophical Transactions of*  
514 *the Royal Society of London. Series B: Biological Sciences*, 357(1421):619–626.
- 515 Brunner, S., Roberts, N., Wylie, L., Moore, L., Aitken, S., Davies, S., Sanders, M., Ellis, P., Alder, C.,  
516 Hooks, Y., Abascal, F., Stratton, M., Martincorena, I., Hoare, M., and Campbell, P. (2019). Somatic  
517 mutations and clonal dynamics in healthy and cirrhotic human liver. *Nature*, 574(7779):538–542.
- 518 Castro-Giner, F., Ratcliffe, P., and Tomlinson, I. (2015). The mini-driver model of polygenic cancer  
519 evolution. *Nature Reviews Cancer*, 15(11):680.
- 520 Cross, W., Kovac, M., Mustonen, V., Temko, D., Davis, H., Baker, A.-M., Biswas, S., Arnold, R.,  
521 Chegwiddden, L., Gatenbee, C., Anderson, A. R., Koelzer, V. H., Martinez, P., Jiang, X., Domingo,  
522 E., Woodcock, D. J., Feng, Y., Kovacova, M., Maughan, T., Adams, R., Bach, S., Beggs, A., Brown,  
523 L., Buffa, F., Cazier, J.-B., Blake, A., Wu, C.-H., Chatzpi, E., Richman, S., Dunne, P., Harkin, P.,  
524 Higgins, G., Hill, J., Holmes, C., Horgan, D., Kaplan, R., Kennedy, R., Lawler, M., Leedham, S.,  
525 McDermott, U., McKenna, G., Middleton, G., Morton, D., Murray, G., Quirke, P., Salto-Tellez, M.,  
526 Samuel, L., Schuh, A., Sebag-Montefiore, D., Seymour, M., Sharma, R., Sullivan, R., Tomlinson, I.,  
527 West, N., Wilson, R., Jansen, M., Rodriguez-Justo, M., Ashraf, S., Guy, R., Cunningham, C., East,  
528 J. E., Wedge, D. C., Wang, L. M., Palles, C., Heinimann, K., Sottoriva, A., Leedham, S. J., Graham,  
529 T. A., Tomlinson, I. P. M., and Consortium, T. S. (2018). The evolutionary landscape of colorectal  
530 tumorigenesis. *Nature ecology & evolution*, 2(10):1661.
- 531 Davis, A., Gao, R., and Navin, N. (2017). Tumor evolution: Linear, branching, neutral or punctuated?  
532 *Biochimica et Biophysica Acta (BBA)-Reviews on Cancer*, 1867(2):151–161.
- 533 Del Monte, U. (2009). Does the cell number 109 still really fit one gram of tumor tissue? *Cell Cycle*,  
534 8(3):505–506.
- 535 Fearon, E. R. and Vogelstein, B. (1990). A genetic model for colorectal tumorigenesis. *cell*, 61(5):759–  
536 767.
- 537 Gao, R., Davis, A., McDonald, T., Sei, E., Shi, X., Wang, Y., Tsai, P., Casasent, A., Waters, J., Zhang,  
538 H., Meric-Bernstam, F., Michor, F., and Navin, N. (2016). Punctuated copy number evolution and  
539 clonal stasis in triple-negative breast cancer. *Nature genetics*, 48(10):1119.
- 540 Gerrish, P. J. and Lenski, R. E. (1998). The fate of competing beneficial mutations in an asexual popu-  
541 lation. *Genetica*, 102:127.
- 542 Gould, N. E.-S. J. and Eldredge, N. (1972). Punctuated equilibria: an alternative to phyletic gradualism.  
543 *Essential readings in evolutionary biology*, pages 82–115.
- 544 Iwasaki, W. M. and Innan, H. (2017). Simulation framework for generating intratumor heterogeneity  
545 patterns in a cancer cell population. *PloS one*, 12(9):e0184229.
- 546 jay Gould, S. and Eldredge, N. (1993). Punctuated equilibrium comes of age. *Nature*, 366(6452):223.
- 547 Lee, J.-K., Wang, J., Sa, J. K., Ladewig, E., Lee, H.-O., Lee, I.-H., Kang, H. J., Rosenbloom, D. S.,  
548 Camara, P. G., Liu, Z., van Nieuwenhuizen, P., Jung, S. W., Choi, S. W., Kim, J., Chen, A., Kim,  
549 K.-T., Shin, S., Seo, Y. J., Oh, J.-M., Shin, Y. J., Park, C.-K., Kong, D.-S., Seol, H. J., Blumberg, A.,  
550 Lee, J.-I., Iavarone, A., Park, W.-Y., Rabadan, R., and Nam, D.-H. (2017). Spatiotemporal genomic  
551 architecture informs precision oncology in glioblastoma. *Nature genetics*, 49(4):594.
- 552 Ling, S., Hu, Z., Yang, Z., Yang, F., Li, Y., Lin, P., Chen, K., Dong, L., Cao, L., Tao, Y., Hao, L.,  
553 Chen, Q., Gong, Q., Wu, D., Li, W., Zhao, W., Tian, X., Hao, C., Hungate, E., Catenacci, D., Hudson,  
554 R., Li, W., Lu, X., and Wu, C. (2015). Extremely high genetic diversity in a single tumor points  
555 to prevalence of non-darwinian cell evolution. *Proceedings of the National Academy of Sciences*,  
556 112(47):E6496–E6505.
- 557 Maynard Smith, J. and Haigh, J. (1974). The hitchhiking effect of a favourable gene. *Genet. Res., Camb.*,  
558 23:23–35.
- 559 McGranahan, N. and Swanton, C. (2017). Clonal heterogeneity and tumor evolution: past, present, and  
560 the future. *Cell*, 168(4):613–628.
- 561 Minussi, D. C., Henz, B., dos Santos Oliveira, M., Filippi-Chiela, E. C., Oliveira, M. M., and Lenz, G.

- 562 (2019). esicancer: Evolutionary in silico cancer simulator. *Cancer research*, 79(5):1010–1013.
- 563 Niida, A., Hasegawa, T., and Miyano, S. (2019). Sensitivity analysis of agent-based simulation utilizing  
564 massively parallel computation and interactive data visualization. *PLoS one*, 14(3):e0210678.
- 565 Niida, A., Iwasaki, W. M., and Innan, H. (2018a). Neutral theory in cancer cell population genetics.  
566 *Molecular biology and evolution*, 35(6):1316–1321.
- 567 Niida, A., Nagayama, S., Miyano, S., and Mimori, K. (2018b). Understanding intratumor heterogeneity  
568 by combining genome analysis and mathematical modeling. *Cancer science*, 109(4):884–892.
- 569 Noble, R., Burri, D., Kather, J. N., and Beerenwinkel, N. (2019). Spatial structure governs the mode of  
570 tumour evolution. *bioRxiv*, page 586735.
- 571 Nowell, P. C. (1976). The clonal evolution of tumor cell populations. *Science*, 194(4260):23–28.
- 572 Ohta, T. and Kimura, M. (1975). The effect of a selected linked locus on heterozygosity of neutral alleles  
573 (the hitch-hiking effect). *Genet. Res., Camb.*, 25:313–326.
- 574 Ohtsuki, H. and Innan, H. (2017). Forward and backward evolutionary processes and allele frequency  
575 spectrum in a cancer cell population. *Theor. Popul. Biol.*, 117:43–50.
- 576 Poleszczuk, J., Hahnfeldt, P., and Enderling, H. (2015). Evolution and phenotypic selection of cancer  
577 stem cells. *PLoS computational biology*, 11(3):e1004025.
- 578 Saito, T., Niida, A., Uchi, R., Hirata, H., Komatsu, H., Sakimura, S., Hayashi, S., Nambara, S., Kuroda,  
579 Y., Ito, S., Eguchi, H., Masuda, T., Sugimachi, K., Tobo, T., Nishida, H., Daa, T., Chiba, K., Shiraishi,  
580 Y., Yoshizato, T., Kodama, M., Okimoto, T., Mizukami, K., Ogawa, R., Okamoto, K., Shuto, M.,  
581 Fukuda, K., Matsui, Y., Shimamura, T., Hasegawa, T., Doki, Y., Nagayama, S., Yamada, K., Kato,  
582 M., Shibata, T., Mori, M., Aburatani, H., Murakami, K., Suzuki, Y., Ogawa, S., Miyano, S., and  
583 Mimori, K. (2018). A temporal shift of the evolutionary principle shaping intratumor heterogeneity in  
584 colorectal cancer. *Nature communications*, 9(1):2884.
- 585 Sato, K., Niida, A., Masuda, T., Shimizu, D., Tobo, T., Kuroda, Y., Eguchi, H., Nakagawa, T., Suzuki,  
586 Y., and Mimori, K. (2019). Multiregion genomic analysis of serially transplanted patient-derived  
587 xenograft tumors. *Cancer Genomics-Proteomics*, 16(1):21–27.
- 588 Sidow, A. and Spies, N. (2015). Concepts in solid tumor evolution. *Trends Genet.*, 31(4):208–214.
- 589 Snippet, H. J., Schepers, A. G., van Es, J. H., Simons, B. D., and Clevers, H. (2014). Biased competition  
590 between *lgr5* intestinal stem cells driven by oncogenic mutation induces clonal expansion. *EMBO*  
591 *reports*, 15(1):62–69.
- 592 Solé, R. V., Rodríguez-Caso, C., Deisboeck, T. S., and Saldaña, J. (2008). Cancer stem cells as the  
593 engine of unstable tumor progression. *Journal of theoretical biology*, 253(4):629–637.
- 594 Sottoriva, A., Kang, H., Ma, Z., Graham, T., Salomon, M., Zhao, J., Marjoram, P., Siegmund, K., Press,  
595 M., Shibata, D., and Curtis, C. (2015). A big bang model of human colorectal tumor growth. *Nature*  
596 *genetics*, 47(3):209.
- 597 Sottoriva, A., Verhoeff, J. J., Borovski, T., McWeeney, S. K., Naumov, L., Medema, J. P., Slood, P. M.,  
598 and Vermeulen, L. (2010). Cancer stem cell tumor model reveals invasive morphology and increased  
599 phenotypical heterogeneity. *Cancer research*, 70(1):46–56.
- 600 Suzuki, H., Aoki, K., Chiba, K., Sato, Y., Shiozawa, Y., Shiraishi, Y., Shimamura, T., Niida, A., Moto-  
601 mura, K., Ohka, F., Yamamoto, T., Tanahashi, K., Ranjit, M., Wakabayashi, T., Yoshizato, T., Kataoka,  
602 K., Yoshida, K., Nagata, Y., Sato-Otsubo, A., Tanaka, H., Sanada, M., Kondo, Y., Nakamura, H., Mi-  
603 zoguchi, M., Abe, T., Muragaki, Y., Watanabe, R., Ito, I., Miyano, S., Natsume, A., and Ogawa, S.  
604 (2015). Mutational landscape and clonal architecture in grade ii and iii gliomas. *Nature genetics*,  
605 47(5):458.
- 606 Turajlic, S., Xu, H., Litchfield, K., Rowan, A., Horswell, S., Chambers, T., O'Brien, T., Lopez, J.,  
607 Watkins, T., Nicol, D., Stares, M., Challacombe, B., Hazell, S., Chandra, A., Mitchell, T., Au, L.,  
608 Eichler-Jonsson, C., Jabbar, F., Soultati, A., Chowdhury, S., Rudman, S., Lynch, J., Fernando, A.,  
609 Stamp, G., Nye, E., Stewart, A., Xing, W., Smith, J., Escudero, M., Huffman, A., Matthews, N., Elgar,  
610 G., Phillimore, B., Costa, M., Begum, S., Ward, S., Salm, M., Boeing, S., Fisher, R., Spain, L., Navas,  
611 C., Gronroos, E., Hobor, S., Sharma, S., Aurangzeb, I., Lall, S., Polson, A., Varia, M., Horsfield,  
612 C., Fotiadis, N., Pickering, L., Schwarz, R., Silva, B., Herrero, J., Luscombe, N., Jamal-Hanjani, M.,  
613 Rosenthal, R., Birnbak, N., Wilson, G., Pipek, O., Ribli, D., Krzystanek, M., Csabai, I., Szallasi, Z.,  
614 Gore, M., McGranahan, N., Van, L. P., Campbell, P., Larkin, J., and Swanton, C. (2018). Deterministic  
615 evolutionary trajectories influence primary tumor growth: Tracerx renal. *Cell*, 173(3):595–610.
- 616 Uchi, R., Takahashi, Y., Niida, A., Shimamura, T., Hirata, H., Sugimachi, K., Sawada, G., Iwaya, T.,

- 617 Kurashige, J., Shinden, Y., Iguchi, T., Eguchi, H., Chiba, K., Shiraishi, Y., Nagae, G., Yoshida, K.,  
618 Nagata, Y., Haeno, H., Yamamoto, H., Ishii, H., Doki, Y., Inuma, H., Sasaki, S., Nagayama, S.,  
619 Yamada, K., Yachida, S., Kato, M., Shibata, T., Oki, E., Saeki, H., Shirabe, K., Oda, Y., Maehara, Y.,  
620 Komune, S., Mori, M., Suzuki, Y., Yamamoto, K., Aburatani, H., Ogawa, S., Miyano, S., and Mimori,  
621 K. (2016). Integrated multiregional analysis proposing a new model of colorectal cancer evolution.  
622 *PLoS genetics*, 12(2):e1005778.
- 623 Verhulst, P.-F. (1838). Notice sur la loi que la population suit dans son accroissement. *Corresp. Math.*  
624 *Phys.*, 10:113–126.
- 625 Waclaw, B., Bozic, I., Pittman, M. E., Hruban, R. H., Vogelstein, B., and Nowak, M. A. (2015).  
626 A spatial model predicts that dispersal and cell turnover limit intratumour heterogeneity. *Nature*,  
627 525(7568):261.
- 628 West, J., Schenck, R., Gatenbee, C., Robertson-Tessi, M., and Anderson, A. R. (2019). Tissue structure  
629 accelerates evolution: premalignant sweeps precede neutral expansion. *bioRxiv*, page 542019.
- 630 Yates, L. R. and Campbell, P. J. (2012). Evolution of the cancer genome. *Nature Reviews Genetics*,  
631 13(11):795.
- 632 Yokoyama, A., Kakiuchi, N., Yoshizato, T., Nannya, Y., Suzuki, H., Takeuchi, Y., Shiozawa, Y., Sato,  
633 Y., Aoki, K., Kim, S., Fujii, Y., Yoshida, K., Kataoka, K., Nakagawa, M., Inoue, Y., Hirano, T.,  
634 Shiraishi, Y., Chiba, K., Tanaka, H., Sanada, M., Nishikawa, Y., Amanuma, Y., Ohashi, S., Aoyama,  
635 I., Horimatsu, T., Miyamoto, S., Tsunoda, S., Sakai, Y., Narahara, M., Brown, J., Sato, Y., Sawada, G.,  
636 Mimori, K., Minamiguchi, S., Haga, H., Seno, H., Miyano, S., Makishima, H., Muto, M., and Ogawa,  
637 S. (2019). Age-related remodelling of oesophageal epithelia by mutated cancer drivers. *Nature*,  
638 565(7739):312.
